# Supplementary material for: Follicular fluid C3a-peptide promotes oocyte maturation through F-actin aggregation
Source: PubMed Central journal article supplement (PMC10709936; doi:10.1186/s12915-023-01760-6), 2023-12-08
Supplement: 12915_2023_1760_MOESM2_ESM.pdf [file 12915_2023_1760_MOESM2_ESM.pdf]

**Figure 1S. Screening effective short peptides for oocyte maturation according to the percentages at the GV, GVBD, MI, and MII stages.**

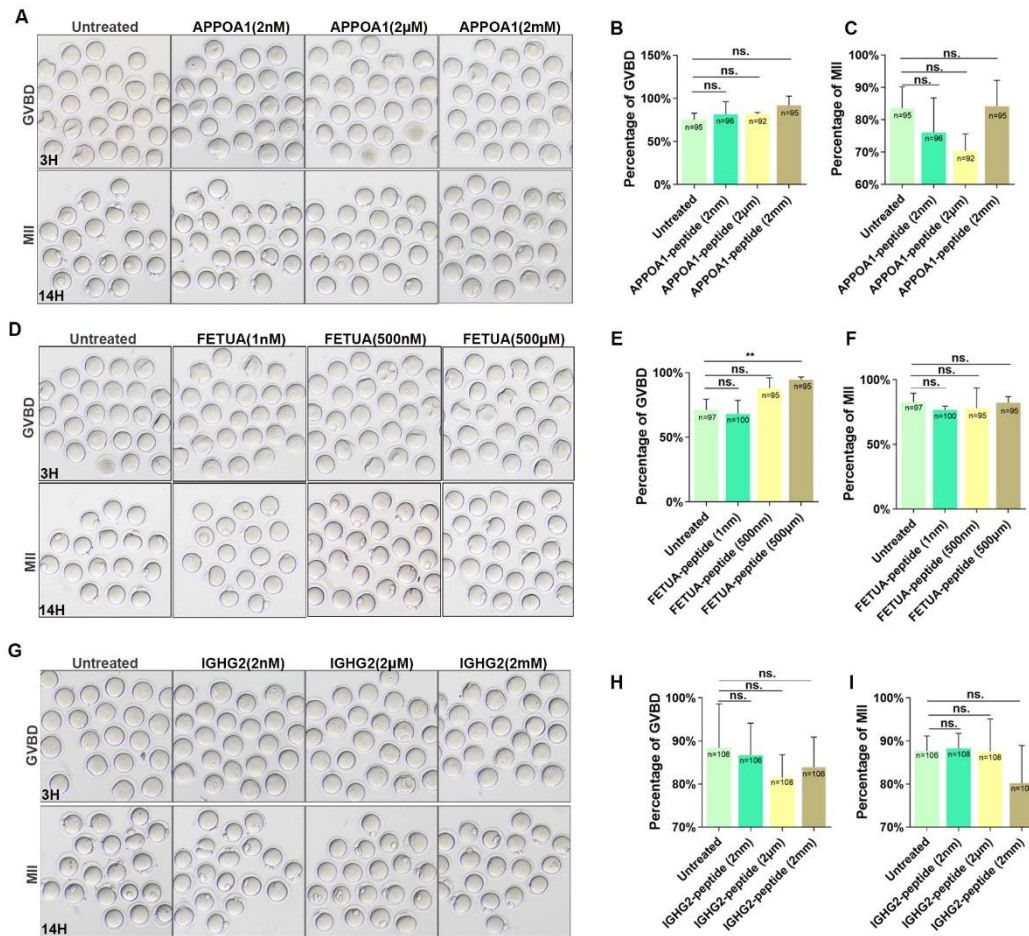

The synthetic short peptides were tested by adding them at various concentrations to the medium. The short peptides were C3a-peptide, APPOA1, FETUA, and IGHC2. In addition to C3a-peptide, three other short peptides were evaluated, but they did not promote the growth and development of mouse ovarian follicles at either the GVBD or MII stages.
