# Supplementary material for: Follicular fluid C3a-peptide promotes oocyte maturation through F-actin aggregation
Source: PubMed Central journal article supplement (PMC10709936; doi:10.1186/s12915-023-01760-6), 2023-12-08
Supplement: 12915_2023_1760_MOESM4_ESM.pdf [file 12915_2023_1760_MOESM4_ESM.pdf]

**Figure 3S. C3aR is expressed in oocytes, and C3aR and  $\beta$ -tubulin are entirely co-localized on the spindles**

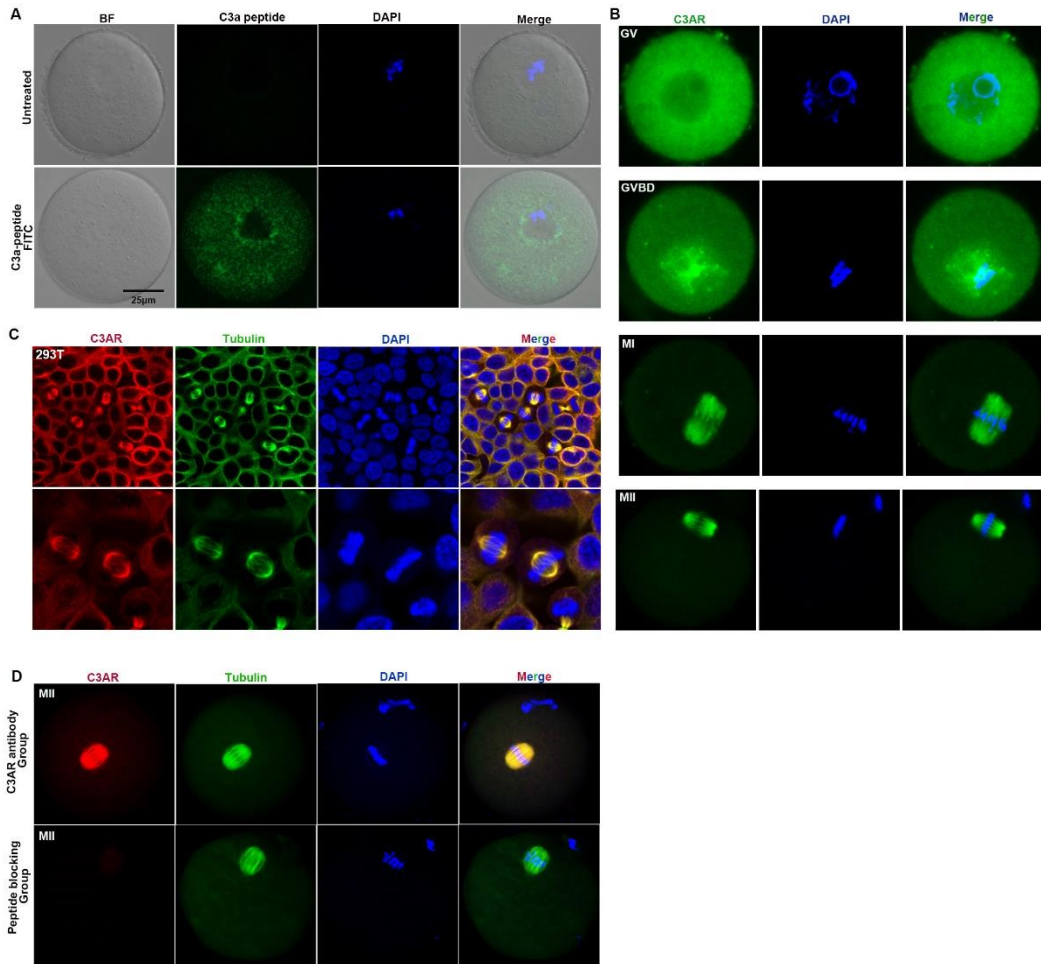

**(A)** Immunofluorescence image shows that synthetic C3a-peptide labeled by FITC distributed evenly in the cytoplasm of mouse oocytes. **(B)** C3aR expression in the developing oocyte was verified by immunofluorescence staining with a C3aR antibody derived from a different company. **(C)** Double immunofluorescence staining with C3aR and tubulin antibodies verified that the C3aR and  $\beta$ -tubulin positive signals were entirely co-localized on the spindles in 293T cells, a somatic cell line. **(D)** The specificity of primary antibody C3aR is confirmed through peptide blocking assays.
