# Supplementary material for: Follicular fluid C3a-peptide promotes oocyte maturation through F-actin aggregation
Source: PubMed Central journal article supplement (PMC10709936; doi:10.1186/s12915-023-01760-6), 2023-12-08

### 1. The Original gel/blots of Figure 3A

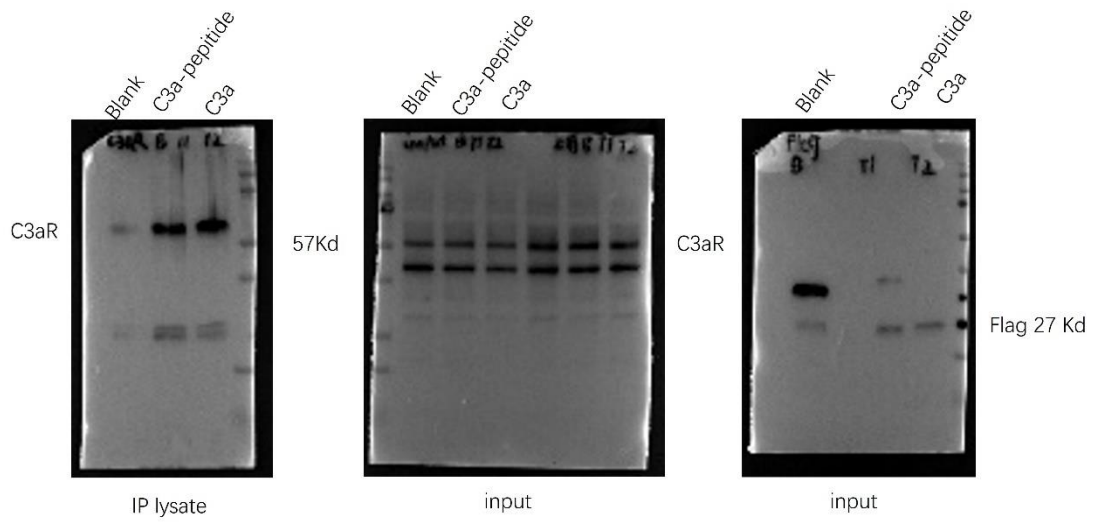

### 2. The Original gel/blots of Figure 4B

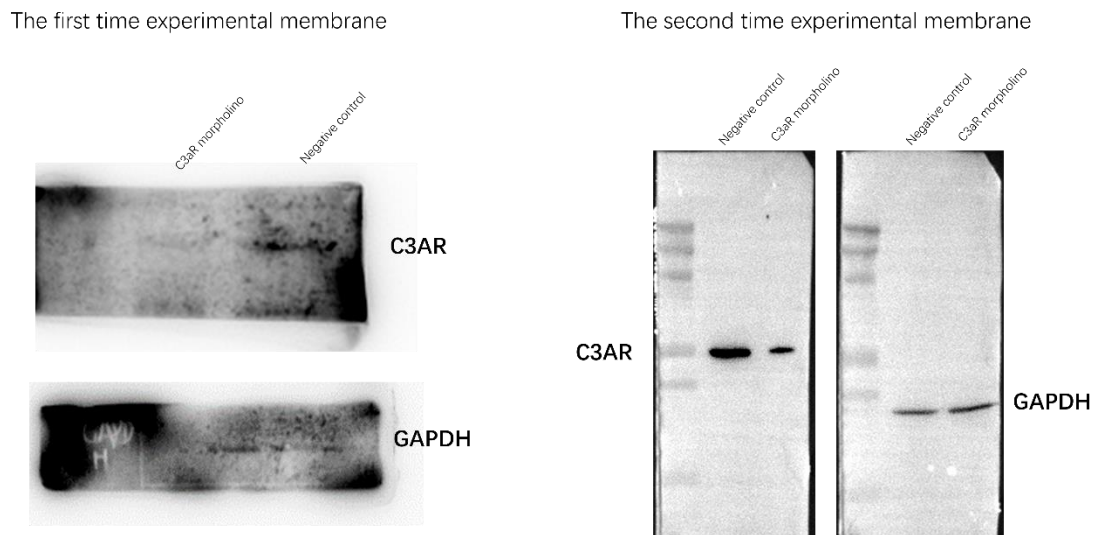

### 3. The Original gel/blots of Figure 5G

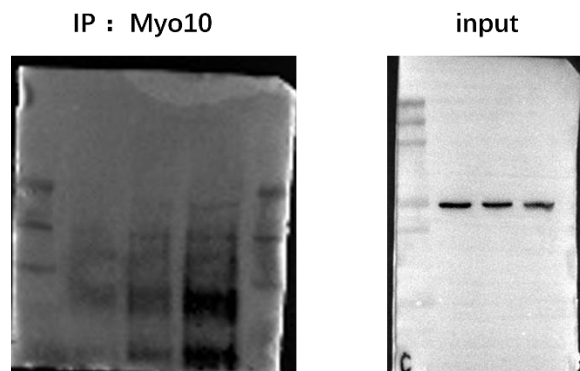

Supplement: 12915_2023_1760_MOESM6_ESM.pdf [file 12915_2023_1760_MOESM6_ESM.pdf]
